# Supplementary material for: In situ differentiation of CD8αα Τ cells from CD4 T cells in peripheral lymphoid tissues
Source: PubMed Central journal article supplement — Sci Rep. 2012 Sep 7;2:642. doi: 10.1038/srep00642 (PMC3435563; doi:10.1038/srep00642), 2012-09-07

## Supplementary Information

**Title:** *In situ* differentiation of CD8 $\alpha\alpha$  T cells from CD4 T cells in peripheral lymphoid tissues

**Author:** Yukiko Nambu<sup>1§†</sup>, Tatsunari Hayashi<sup>1</sup>, Kyoung-Jin Jang<sup>1</sup>, Koji Aoki<sup>2</sup>, Hiroto Mano<sup>1</sup>, Keiko Nakano<sup>1</sup>, Motomi Osato<sup>3,4</sup>, Katsu Takahashi<sup>5</sup>, Katsuhiko Itoh<sup>6</sup>, Satoshi Teramukai<sup>7</sup>, Toshihisa Komori<sup>8</sup>, Jun Fujita<sup>6</sup>, Yoshiaki Ito<sup>3,4</sup>, Akira Shimizu<sup>1</sup> and Manabu Sugai<sup>1§\*</sup>

### Author's affiliation:

<sup>1</sup>Department of Experimental Therapeutics, Translational Research Center, Kyoto University Hospital, 54 Shogoin-Kawahara-cho, Sakyo-ku, Kyoto 606-8507, Japan

<sup>2</sup>Department of Life Science, Organization for Tenure System for Innovative Research, University of Fukui23-3 Matsuokashimoaizuki, Eiheiji-cho, Yoshida-gun, Fukui Prefecture, Japan. 910-1193

<sup>3</sup>Cancer Science Institute of Singapore, National University of Singapore, 28 Medical Drive, Singapore 117456, Singapore

<sup>4</sup>Institute of Molecular and Cell Biology, 61 Biopolis Drive, Proteos, Singapore 138673, Singapore

<sup>5</sup>Department of Oral and Maxillofacial Surgery, Graduate School of Medicine, Kyoto University, 54 Shogoin-Kawahara-cho, Sakyo-ku, Kyoto 606-8507, Japan

<sup>6</sup>Department of Clinical Molecular Biology, Graduate School of Medicine, Kyoto University, 54 Shogoin-Kawahara-cho, Sakyo-ku, Kyoto 606-8507, Japan

<sup>7</sup>Department of Clinical Trial Design and Management, Translational Research Center, Kyoto University Hospital, 54 Shogoin-Kawahara-cho, Sakyo-ku, Kyoto 606-8507, Japan

<sup>8</sup>Department of Cell Biology, Unit of Basic Medical Sciences, Nagasaki University Graduate School of Biomedical Sciences, Nagasaki 852-8588, Japan

## Legend to Supplementary Figure

### **Supplementary Fig S1. Generation of CD8 $\alpha\beta$ T cells from Runx3<sup>-/-</sup> CD4 T cells *in vivo***

FACS analysis of lymphocytes from Rag2<sup>-/-</sup> mice (CD45.1) that received naïve CD4 T cells (CD45.2) from Runx3<sup>-/-</sup> FL-derived cells after high dose atRA administration. TCR $\alpha\beta$ +CD45.2+ CD4-CD8 $\alpha$ + T cells were examined for expression of CD8 $\alpha$  and CD8 $\beta$ .

Supplementary Fig. S1

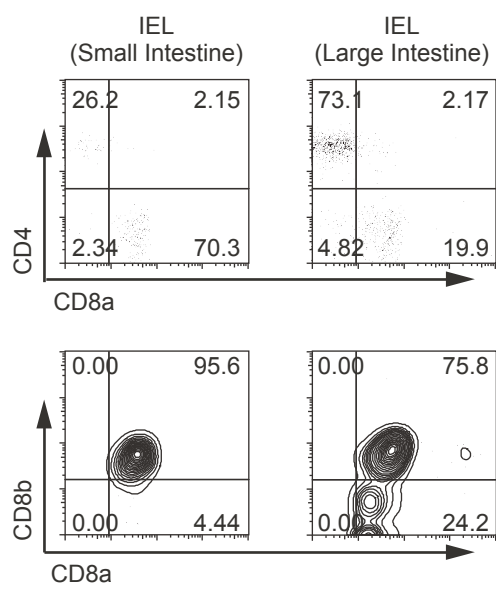

Supplement: srep00642-s1.pdf [file srep00642-s1.pdf]
